# Supplementary material
Source: PubMed Central journal article supplement (PMC6963253)
Supplement: baADV2019000756-suppl1.pdf [file baADV2019000756-suppl1.pdf]

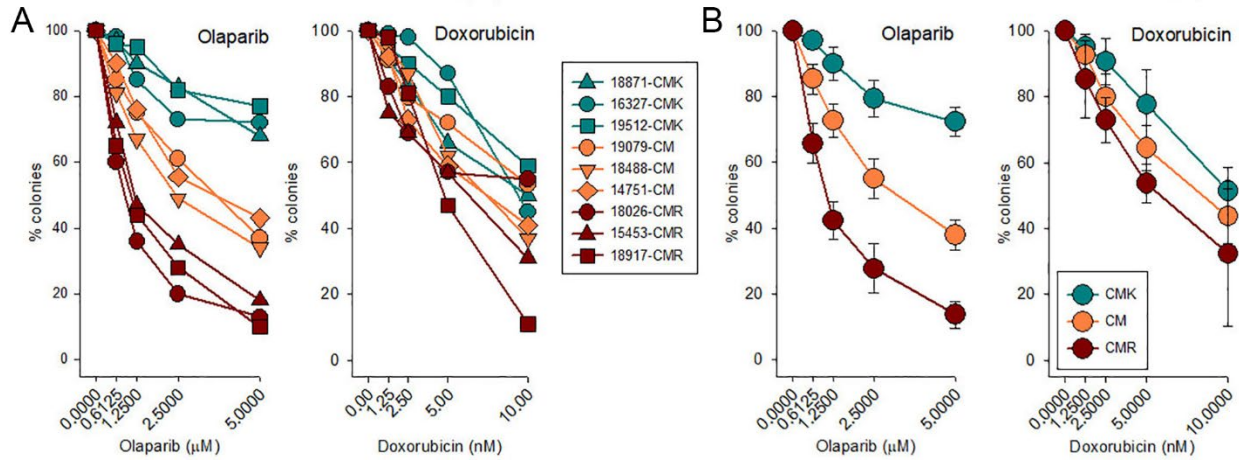

**Supplemental Figure 1. c-KITmut is associated with resistance to PARPi olaparib, but not to doxorubicin in CBFB-MYH11 –positive AMLs.** Clonogenic potential of Lin-CD34+ cells from individual AML patients harboring CBFB-MYH11 (CM), CBFB-MYH11 + c-KITmut (CMK) and CBFB-MYH11 + NRASmut (CMR) treated with the indicated concentrations of olaparib or doxorubicin. **(A)** Mean percentage of colonies from individual samples tested in triplicates. **(B)** Mean percentage  $\pm$  SD of colonies compared to untreated counterparts from the samples harboring the same mutations.

Table 1. Genetic aberrations in freshly diagnosed AML samples from E1900 clinical trial.

| <b>Translocation</b> | <b>Acc#</b> | <b>c-KITmut</b> | <b>NRASmut</b> |
|----------------------|-------------|-----------------|----------------|
|                      | 14751       |                 |                |
|                      | 18488       |                 |                |
|                      | 19079       |                 |                |
| <b>CBFB-MYH11</b>    | 16327       | D816V           |                |
|                      | 18871       | FS (418)        |                |
|                      | 19512       | FS(418)         |                |
|                      | 15453       |                 | G13D           |
|                      | 18026       |                 | G12D           |
|                      | 18917       |                 | Q61K           |
|                      | 15835       | FS (418)        |                |
| <b>AML1-ETO</b>      | 19135       | D816V           |                |
|                      | 19537       | FS (418)        |                |
|                      | 18310       |                 |                |
|                      | 19356       |                 |                |
|                      | 14969       |                 |                |
|                      | 17298       |                 |                |
